# Supplementary material
Source: PubMed Central journal article supplement (PMC7490748)
Supplement: jamaneurol-e203324-s001.pdf [file jamaneurol-e203324-s001.pdf]

## Supplementary Online Content

Nguyen A-L, Vodehnalova K, Kalincik T, et al. Association of pregnancy with the onset of clinically isolated syndrome. *JAMA Neurol*. Published online September 14, 2020. doi: 10.1001/jamaneurol.2020.3324

**eFigure.** Kaplan-Meier Curves (Using the Simon and Makuch Method) for Time to CIS by Gravida and Parity

**eTable.** Cox Regression Analysis of the Hazard of CIS Onset: Sensitivity Analysis Left-Censoring at 18 Years Compared to 16 Years

This supplementary material has been provided by the authors to give readers additional information about their work.

**eFigure.** Kaplan-Meier Curves (Using the Simon and Makuch Method) for Time to CIS by Gravida and Parity

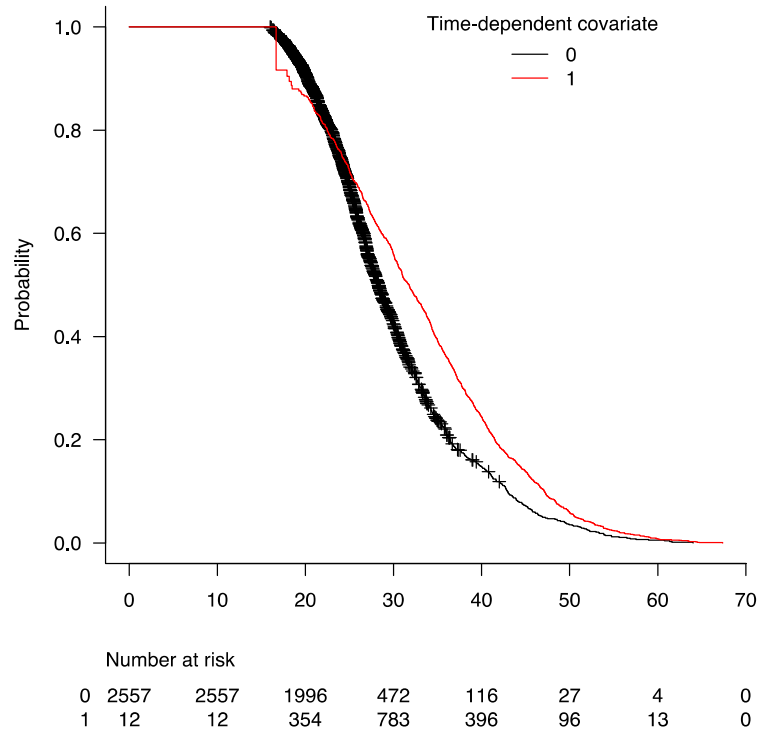

**A. GRAVIDA**

Legend: 1=Gravida; 0=Nulligravida

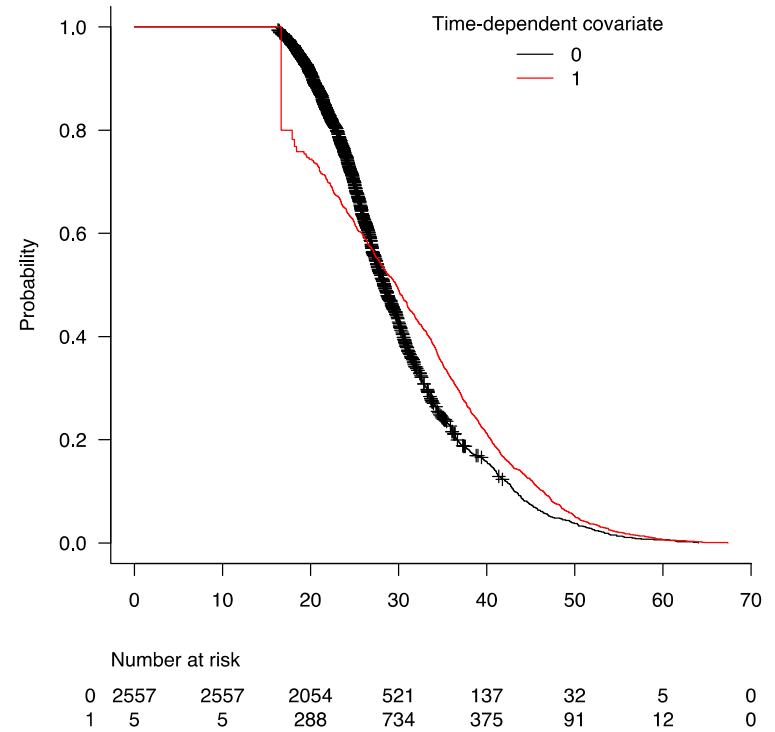

**B. PARITY**

Legend: 1=Parous; 0=Nulliparous

**eTable.** Cox Regression Analysis of the Hazard of CIS Onset: Sensitivity Analysis Left-Censoring at 18 Years Compared to 16 Years

| Primary analysis<br><i>Left censor 16y</i> |                  |         | Sensitivity analysis<br><i>Left censor 18y</i> |         |
|--------------------------------------------|------------------|---------|------------------------------------------------|---------|
|                                            | HR (95% CI)      | p-value | HR (95% CI)                                    | p-value |
| <b>GRAVIDA (pregnancies)</b>               |                  |         |                                                |         |
| Gravida                                    |                  |         |                                                |         |
| No                                         | Ref              |         | Ref                                            |         |
| Yes                                        | 0.68 (0.62-0.75) | <0.001  | 0.68 (0.62-0.75)                               | <0.001  |
| No. of pregnancies                         |                  |         |                                                |         |
| 0                                          | Ref              |         | Ref                                            |         |
| 1                                          | 0.70 (0.61-0.79) | <0.001  | 0.70 (0.61-0.79)                               | <0.001  |
| 2                                          | 0.67 (0.60-0.76) | <0.001  | 0.68 (0.61-0.77)                               | <0.001  |
| 3+                                         | 0.66 (0.58-0.75) | <0.001  | 0.66 (0.58-0.76)                               | <0.001  |
| <b>PARITY (childbirths)</b>                |                  |         |                                                |         |
| Parous                                     |                  |         |                                                |         |
| No                                         | Ref              |         | Ref                                            |         |
| Yes                                        | 0.68 (0.61-0.75) | <0.001  | 0.69 (0.62-0.76)                               | <0.001  |
| No. of childbirths                         |                  |         |                                                |         |
| 0                                          | Ref              |         | Ref                                            |         |
| 1                                          | 0.70 (0.62-0.79) | <0.001  | 0.71 (0.63-0.80)                               | <0.001  |
| 2                                          | 0.66 (0.58-0.74) | <0.001  | 0.68 (0.60-0.76)                               | <0.001  |
| 3+                                         | 0.69 (0.58-0.81) | <0.001  | 0.68 (0.57-0.81)                               | <0.001  |

Abbreviations: CI, confidence interval; HR, hazard ratio; no., number; ref, reference hazard ratio (1.0); y, years.

These analyses were all adjusted for site.

Left censor: women who had CIS onset  $\leq 16$  years or were pregnant  $< 16$  years were excluded in the primary analysis. The sensitivity analysis left censored at 18 years.
